# Supplementary material for: Altered expression and mutations in cell cycle genes CCND1, CDK4, CDKN2B and TP53 are associated with Pakistani breast cancer patients
Source: Research Square preprint supplement (doi:10.21203/rs.3.rs-7532323/v1), 2025-09-15
Supplement: Supplementary file 1 [file 1b0e9eb63467ac0d8ef5e489.xlsx]

## Sheet: Sheet1
Human CDK4 Gene Expression
Test Samples									housekeeping
Sample ID	Ct1	Ct2	Ct3	Min	Max	Range	St. deviation	average Ct	Ct1	Ct2	Ct3	Min	Max	Range	St. deviation	average Ct	DCt Value	DDCt Value	2^-DDCt Value
HMT-1	28.29	29.18	28.5	28.29	29.18	0.89	0.465224	28.6567	33.45	33.5	34.1	33.45	34.1	0.65	0.361709	33.6833	-5.02667	-10.9	1910.85
HMN-1	31.94	31.98	31.82	31.82	31.98	0.16	0.0832666	31.9133	26.07	26.04	26.01	26.01	26.07	0.06	0.03	26.04	5.87333
HMT-2	29.68	29.46	29.3	29.3	29.68	0.38	0.190788	29.48	30.5	30.3	30.43	30.3	30.5	0.2	0.101489	30.41	-0.93	-2.88	7.3615
HMN-2	26.85	27.7	26.96	26.85	27.7	0.85	0.462277	27.17	25.05	25.21	25.4	25.05	25.4	0.35	0.175214	25.22	1.95
HMT-3	30.91	30.41	30.87	30.41	30.91	0.5	0.277849	30.73	26.87	26.55	26.33	26.33	26.87	0.54	0.271539	26.5833	4.14667	0.403333	0.756109
HMN-3	31.43	31.31	31.51	31.31	31.51	0.2	0.100664	31.4167	27.87	27.7	27.45	27.45	27.87	0.42	0.211266	27.6733	3.74333
HMT-4	34.23	34.31	34.33	34.23	34.33	0.1	0.052915	34.29	30.98	31.74	31.13	30.98	31.13	0.15	0.402534	31.2833	3.00667	6.82333	0.00883023
HMN-4	27.3	27.31	27.33	27.3	27.33	0.03	0.0152753	27.3133	31.56	30.79	31.04	30.79	31.56	0.77	0.39281	31.13	-3.81667
HMT-5	17.32	17.77	17.94	17.32	17.94	0.62	0.320364	17.6767	28.39	28.36	28.33	28.33	28.39	0.06	0.03	28.36	-10.6833	-9.45667	702.652
HMN-5	28.3	28.31	28.28	28.28	28.31	0.03	0.0152753	28.2967	29.65	29.61	29.31	29.31	29.65	0.34	0.185831	29.5233	-1.22667
HMT-6	28.43	27.67	28.43	27.67	28.43	0.76	0.438786	28.1767	20.4	19.64	20.47	19.64	20.47	0.83	0.460326	20.17	8.00667	-2.15667	4.45883
HMN-6	32.52	32.33	32	32	32.52	0.52	0.263122	32.2833	22.23	21.77	22.36	21.77	22.36	0.59	0.31	22.12	10.1633
HMT-7	34.38	34.52	33.85	33.85	34.52	0.67	0.353412	34.25	29.65	29.61	29.31	29.31	29.65	0.34	0.185831	29.5233	4.72667	-3.64333	12.4955
HMN-7	31.94	31.98	31.82	31.82	31.98	0.16	0.0832666	31.9133	23.5	23.58	23.55	23.5	23.58	0.08	0.0404145	23.5433	8.37
HMT-8	28.7	28.76	28.73	28.7	28.76	0.06	0.03	28.73	29.9	30.7	30.34	29.9	30.7	0.8	0.400666	30.3133	-1.58333	-8.82333	452.989
HMN-8	32.52	32.33	32	32	32.52	0.52	0.263122	32.2833	25.02	25.5	24.61	24.61	25.02	0.41	0.445459	25.0433	7.24
HMT-9	33.37	33.94	33.07	33.07	33.94	0.87	0.441928	33.46	29.27	28.91	29.5	28.91	29.27	0.36	0.297377	29.2267	4.23333	2.70333	0.153538
HMN-9	28.16	28.16	28.02	28.02	28.16	0.14	0.080829	28.1133	26.87	26.55	26.33	26.33	26.87	0.54	0.271539	26.5833	1.53
HMT-10	18.9	18.93	18.96	18.9	18.96	0.06	0.03	18.93	29.1	29.14	29.19	29.1	29.19	0.09	0.0450925	29.1433	-10.2133	-10.94	1964.57
HMN-10	27.18	27.2	27.3	27.18	27.3	0.12	0.064291	27.2267	26.53	26.5	26.47	26.47	26.53	0.06	0.03	26.5	0.726667
HMT-11	30.53	30.58	30.55	30.53	30.58	0.05	0.0251661	30.5533	25.45	24.62	24.67	24.62	24.67	0.05	0.465439	24.9133	5.64	-3.34	10.1261
HMN-11	32.5	32.77	32.3	32.3	32.77	0.47	0.235867	32.5233	23.5	23.58	23.55	23.5	23.58	0.08	0.0404145	23.5433	8.98
HMT-12	28.83	27.93	28.75	27.93	28.83	0.9	0.49813	28.5033	29.47	29.37	30.12	29.37	30.12	0.75	0.407226	29.6533	-1.15	-8.37333	331.608
HMN-12	34.73	34.75	34.79	34.73	34.79	0.06	0.0305505	34.7567	27.5	27.57	27.53	27.5	27.57	0.07	0.0351188	27.5333	7.22333
HMT-13	24.19	24.22	24.16	24.16	24.22	0.06	0.03	24.19	21.49	21.53	21.59	21.49	21.59	0.1	0.0503322	21.5367	2.65333	-8.65	401.707
HMN-13	27.35	27.2	27.27	27.2	27.35	0.15	0.0750555	27.2733	16.05	15.91	15.95	15.91	16.05	0.14	0.072111	15.97	11.3033
HMT-15	30.9	30.95	30.93	30.9	30.95	0.05	0.0251661	30.9267	24.36	24.38	24.67	24.36	24.67	0.31	0.173494	24.47	6.45667	-6.69	103.25
HMN-15	35.09	35.13	34.95	34.95	35.13	0.18	0.0945163	35.0567	21.95	21.91	21.87	21.87	21.95	0.08	0.04	21.91	13.1467
HMT-16	28.64	28.66	28.68	28.64	28.68	0.04	0.02	28.66	30.45	30.38	30.32	30.32	30.45	0.13	0.0650641	30.3833	-1.72333	2.23333	0.212667
HMN-16	25.86	25.67	26.09	25.67	26.09	0.42	0.210317	25.8733	29.78	29.88	29.83	29.78	29.88	0.1	0.05	29.83	-3.95667
HMT-17	30.33	30.45	30.47	30.33	30.47	0.14	0.0757188	30.4167	24.5	24.29	24.46	24.29	24.5	0.21	0.111505	24.4167	6	2.75667	0.147966
HMN-17	31.45	31.55	31.33	31.33	31.55	0.22	0.110151	31.4433	28.01	28.29	28.3	28.01	28.3	0.29	0.164621	28.2	3.24333
HMT-18	13.46	13.42	14.3	13.42	14.3	0.88	0.496924	13.7267	31.57	31.66	31.63	31.57	31.66	0.09	0.0458258	31.62	-17.8933	-8.07333	269.349
HMN-18	18.71	19.24	19.15	18.71	19.24	0.53	0.283608	19.0333	28.78	28.88	28.9	28.78	28.9	0.12	0.064291	28.8533	-9.82
HMT-19	29.66	29.56	29.35	29.35	29.66	0.31	0.158219	29.5233	28	28.03	28.07	28	28.07	0.07	0.0351188	28.0333	1.49	0.773333	0.585064
HMN-19	26.7	26.76	26.56	26.56	26.76	0.2	0.102632	26.6733	25.94	26.03	25.9	25.9	26.03	0.13	0.0665833	25.9567	0.716667
