# Supplementary material for: Altered expression and mutations in cell cycle genes CCND1, CDK4, CDKN2B and TP53 are associated with Pakistani breast cancer patients
Source: Research Square preprint supplement (doi:10.21203/rs.3.rs-7532323/v1), 2025-09-15
Supplement: Supplementary file 2 [file 3f5b7e00a32355b4dd2b8d96.xlsx]

## Sheet: Sheet1
Human CCND1 Gene Expression
Test Samples									housekeeping
Sample ID	Ct1	Ct2	Ct3	Min	Max	Range	Standard deviation	Average Ct	Ct1	Ct2	Ct3	Min	Max	Range	Standard deviation	Average Ct	DCt Value	DDCt Value	2^-DDCt Value
HMT-1	32.23	32.28	32.32	32.23	32.32	0.09	0.0450925	32.2767	33.45	33.5	34.1	33.45	34.1	0.65	0.361709	33.6833	-1.40667	-6.42	85.6274
HMN-1	31.01	31.05	31.1	31.01	31.1	0.09	0.0450925	31.0533	26.07	26.04	26.01	26.01	26.07	0.06	0.03	26.04	5.01333
HMT-2	30.79	30.75	30.67	30.67	30.79	0.12	0.061101	30.7367	30.5	30.3	30.43	30.3	30.5	0.2	0.101489	30.41	0.326667	-8.34	324.034
HMN-2	33.88	33.93	33.85	33.85	33.93	0.08	0.0404145	33.8867	25.05	25.21	25.4	25.05	25.4	0.35	0.175214	25.22	8.66667
HMT-3	25.5	25.58	25.55	25.5	25.58	0.08	0.0404145	25.5433	26.87	26.55	26.33	26.33	26.87	0.54	0.271539	26.5833	-1.04	-3.71	13.0864
HMN-3	30.34	30.38	30.31	30.31	30.38	0.07	0.0351188	30.3433	27.87	27.7	27.45	27.45	27.87	0.42	0.211266	27.6733	2.67
HMT-4	30.45	30.54	30.51	30.45	30.54	0.09	0.0458258	30.5	30.98	31.74	31.13	30.98	31.13	0.15	0.402534	31.2833	-0.783333	1.13	0.456916
HMN-4	29.17	29.23	29.25	29.17	29.25	0.08	0.0416333	29.2167	31.56	30.79	31.04	30.79	31.56	0.77	0.39281	31.13	-1.91333
HMT-5	33.11	33.14	33.17	33.11	33.17	0.06	0.03	33.14	28.39	28.36	28.33	28.33	28.39	0.06	0.03	28.36	4.78	5.11333	0.0288891
HMN-5	29.16	29.21	29.2	29.16	29.21	0.05	0.0264575	29.19	29.65	29.61	29.31	29.31	29.65	0.34	0.185831	29.5233	-0.333333
HMT-6	27.52	27.43	27.66	27.43	27.66	0.23	0.115902	27.5367	20.4	19.64	20.47	19.64	20.47	0.83	0.460326	20.17	7.36667	-3.36	10.2674
HMN-6	32.83	32.88	32.83	32.83	32.88	0.05	0.0288675	32.8467	22.23	21.77	22.36	21.77	22.36	0.59	0.31	22.12	10.7267
HMT-7	25.56	25.99	25.82	25.56	25.99	0.43	0.216564	25.79	29.65	29.61	29.31	29.31	29.65	0.34	0.185831	29.5233	-3.73333	-3.14	8.81524
HMN-7	22.95	22.99	22.91	22.91	22.99	0.08	0.04	22.95	23.5	23.58	23.55	23.5	23.58	0.08	0.0404145	23.5433	-0.593333
HMT-8	28.8	28.35	28.24	28.24	28.8	0.56	0.296704	28.4633	29.9	30.7	30.34	29.9	30.7	0.8	0.400666	30.3133	-1.85	-8.54667	373.941
HMN-8	31.71	31.77	31.74	31.71	31.77	0.06	0.03	31.74	25.02	25.5	24.61	24.61	25.02	0.41	0.445459	25.0433	6.69667
HMT-9	28.25	28.69	28.84	28.25	28.84	0.59	0.306649	28.5933	29.27	28.91	29.5	28.91	29.27	0.36	0.297377	29.2267	-0.633333	-3.10667	8.6139
HMN-9	28.67	29.59	28.91	28.67	29.59	0.92	0.477214	29.0567	26.87	26.55	26.33	26.33	26.87	0.54	0.271539	26.5833	2.47333
HMT-10	31.43	31.48	31.51	31.43	31.51	0.08	0.0404145	31.4733	29.1	29.14	29.19	29.1	29.19	0.09	0.0450925	29.1433	2.33	-5.05667	33.2819
HMN-10	33.88	33.93	33.85	33.85	33.93	0.08	0.0404145	33.8867	26.53	26.5	26.47	26.47	26.53	0.06	0.03	26.5	7.38667
HMT-11	25.21	25.24	25.27	25.21	25.27	0.06	0.03	25.24	25.45	24.62	24.67	24.62	24.67	0.05	0.465439	24.9133	0.326667	3.33333	0.0992126
HMN-11	20.59	20.53	20.49	20.49	20.59	0.1	0.0503322	20.5367	23.5	23.58	23.55	23.5	23.58	0.08	0.0404145	23.5433	-3.00667
HMT-12	26.63	26.69	26.74	26.63	26.74	0.11	0.0550757	26.6867	29.47	29.37	30.12	29.37	30.12	0.75	0.407226	29.6533	-2.96667	-2.76333	6.78963
HMN-12	27.3	27.33	27.36	27.3	27.36	0.06	0.03	27.33	27.5	27.57	27.53	27.5	27.57	0.07	0.0351188	27.5333	-0.203333
HMT-13	27.82	26.97	27.6	27.6	27.82	0.22	0.441173	27.4633	21.49	21.53	21.59	21.49	21.59	0.1	0.0503322	21.5367	5.92667	-7.24	151.167
HMN-13	29.06	29.15	29.2	29.06	29.2	0.14	0.070946	29.1367	16.05	15.91	15.95	15.91	16.05	0.14	0.072111	15.97	13.1667
HMT-15	18.07	18.12	18.17	18.07	18.17	0.1	0.05	18.12	24.36	24.38	24.67	24.36	24.67	0.31	0.173494	24.47	-6.35	-8.65333	402.636
HMN-15	24.2	24.16	24.28	24.16	24.28	0.12	0.061101	24.2133	21.95	21.91	21.87	21.87	21.95	0.08	0.04	21.91	2.30333
HMT-16	27.83	27.86	27.9	27.83	27.9	0.07	0.0351188	27.8633	30.45	30.38	30.32	30.32	30.45	0.13	0.0650641	30.3833	-2.52	-0.573333	1.48796
HMN-16	27.95	27.88	27.82	27.82	27.95	0.13	0.0650641	27.8833	29.78	29.88	29.83	29.78	29.88	0.1	0.05	29.83	-1.94667
HMT-17	25.7	25.73	25.77	25.7	25.77	0.07	0.0351188	25.7333	24.5	24.29	24.46	24.29	24.5	0.21	0.111505	24.4167	1.31667	-0.946667	1.92741
HMN-17	30.47	30.49	30.43	30.43	30.49	0.06	0.0305505	30.4633	28.01	28.29	28.3	28.01	28.3	0.29	0.164621	28.2	2.26333
HMT-18	33.75	33.79	33.82	33.75	33.82	0.07	0.0351188	33.7867	31.57	31.66	31.63	31.57	31.66	0.09	0.0458258	31.62	2.16667	2.68	0.156041
HMN-18	28.31	28.37	28.34	28.31	28.37	0.06	0.03	28.34	28.78	28.88	28.9	28.78	28.9	0.12	0.064291	28.8533	-0.513333
HMT-19	27.5	27.54	27.58	27.5	27.58	0.08	0.04	27.54	28	28.03	28.07	28	28.07	0.07	0.0351188	28.0333	-0.493333	-11.78	3516.68
HMN-19	37.2	37.24	37.29	37.2	37.29	0.09	0.0450925	37.2433	25.94	26.03	25.9	25.9	26.03	0.13	0.0665833	25.9567	11.2867
