# Supplementary material for: Altered expression and mutations in cell cycle genes CCND1, CDK4, CDKN2B and TP53 are associated with Pakistani breast cancer patients
Source: Research Square preprint supplement (doi:10.21203/rs.3.rs-7532323/v1), 2025-09-15
Supplement: Supplementary file 3 [file 8ef73e05191d92b176b86370.xlsx]

## Sheet: Sheet1
Human tp15 (CDKN2B) Gene Expression
Test Samples									housekeeping
Sample ID	Ct1	Ct2	Ct3	Min	Max	Range	St. deviation	average Ct	Ct1	Ct2	Ct3	Min	Max	Range	St. deviation	average Ct	DCt Value	DDCt Value	2^-DDCt Value
HMT-1	34.9	34.33	34.65	34.33	34.9	0.57	0.285715	34.6267	33.45	33.5	34.1	33.45	34.1	0.65	0.361709	33.6833	0.943333	1.77	0.293209
HMN-1	25.43	25.07	25.14	29.76	29.81	0.05	0.190875	25.2133	26.07	26.04	26.01	26.01	26.07	0.06	0.03	26.04	-0.826667
HMT-2	37.47	37.4	37.3	37.3	37.47	0.17	0.08544	37.39	30.5	30.3	30.43	30.3	30.5	0.2	0.101489	30.41	6.98	5.88667	0.0169019
HMN-2	26.33	26.27	26.34	32.35	32.43	0.08	0.0378594	26.3133	25.05	25.21	25.4	25.05	25.4	0.35	0.175214	25.22	1.09333
HMT-3	34.54	34.23	35	34.23	35	0.77	0.387427	34.59	26.87	26.55	26.33	26.33	26.87	0.54	0.271539	26.5833	8.00667	8.99	0.00196671
HMN-3	26.56	27.07	26.44	31.07	31.78	0.71	0.334515	26.69	27.87	27.7	27.45	27.45	27.87	0.42	0.211266	27.6733	-0.983333
HMT-4	32.56	32.9	32.89	32.56	32.9	0.34	0.193477	32.7833	30.98	31.74	31.13	30.98	31.13	0.15	0.402534	31.2833	1.5	6.08333	0.014748
HMN-4	26.43	27.07	26.14	29.52	29.78	0.26	0.47585	26.5467	31.56	30.79	31.04	30.79	31.56	0.77	0.39281	31.13	-4.58333
HMT-5	34.76	34.44	34.56	34.44	34.76	0.32	0.161658	34.5867	28.39	28.36	28.33	28.33	28.39	0.06	0.03	28.36	6.22667	7.42667	0.00581233
HMN-5	28.46	28.09	28.42	32	32.09	0.09	0.20306	28.3233	29.65	29.61	29.31	29.31	29.65	0.34	0.185831	29.5233	-1.2
HMT-6	32.22	32.25	32.29	32.22	32.29	0.07	0.0351188	32.2533	20.4	19.64	20.47	19.64	20.47	0.83	0.460326	20.17	12.0833	5.84667	0.0173771
HMN-6	28.66	28.09	28.32	28.09	28.66	0.57	0.286764	28.3567	22.23	21.77	22.36	21.77	22.36	0.59	0.31	22.12	6.23667
HMT-7	36.09	36.11	36.14	36.09	36.14	0.05	0.0251661	36.1133	29.65	29.61	29.31	29.31	29.65	0.34	0.185831	29.5233	6.59	4.85667	0.0345142
HMN-7	25.34	25.15	25.34	30.75	30.76	0.01	0.109697	25.2767	23.5	23.58	23.55	23.5	23.58	0.08	0.0404145	23.5433	1.73333
HMT-8	34.32	34.35	34.39	34.32	34.39	0.07	0.0351188	34.3533	29.9	30.7	30.34	29.9	30.7	0.8	0.400666	30.3133	4.04	1.87	0.273573
HMN-8	27.23	27.27	27.14	29.76	29.81	0.05	0.0665833	27.2133	25.02	25.5	24.61	24.61	25.02	0.41	0.445459	25.0433	2.17
HMT-9	37.47	37.5	37.55	37.47	37.55	0.08	0.0404145	37.5067	29.27	28.91	29.5	28.91	29.27	0.36	0.297377	29.2267	8.28	7.94667	0.00405336
HMN-9	26.53	27.66	26.56	32.14	32.2	0.06	0.64392	26.9167	26.87	26.55	26.33	26.33	26.87	0.54	0.271539	26.5833	0.333333
HMT-10	35.48	35.45	35.42	35.42	35.48	0.06	0.03	35.45	29.1	29.14	29.19	29.1	29.19	0.09	0.0450925	29.1433	6.30667	5.51333	0.0218938
HMN-10	27.27	27.27	27.34	33.47	33.65	0.18	0.0404145	27.2933	26.53	26.5	26.47	26.47	26.53	0.06	0.03	26.5	0.793333
HMT-11	32.89	32.86	32.83	32.83	32.89	0.06	0.03	32.86	25.45	24.62	24.67	24.62	24.67	0.05	0.465439	24.9133	7.94667	1.23	0.426317
HMN-11	30.26	30.23	30.29	30.23	30.29	0.06	0.03	30.26	23.5	23.58	23.55	23.5	23.58	0.08	0.0404145	23.5433	6.71667
HMT-12	38.64	38.6	38.5	38.5	38.64	0.14	0.072111	38.58	29.47	29.37	30.12	29.37	30.12	0.75	0.407226	29.6533	8.92667	4.82	0.0354026
HMN-12	31.67	31.64	31.61	31.61	31.67	0.06	0.03	31.64	27.5	27.57	27.53	27.5	27.57	0.07	0.0351188	27.5333	4.10667
HMT-13	33.89	33.55	33.82	33.55	33.89	0.34	0.179536	33.7533	21.49	21.53	21.59	21.49	21.59	0.1	0.0503322	21.5367	12.2167	2.66	0.15822
HMN-13	25.44	25.55	25.59	29.76	29.81	0.05	0.0776745	25.5267	16.05	15.91	15.95	15.91	16.05	0.14	0.072111	15.97	9.55667
HMT-15	32.54	32.5	32.57	32.5	32.57	0.07	0.0351188	32.5367	24.36	24.38	24.67	24.36	24.67	0.31	0.173494	24.47	8.06667	3.43	0.0927827
HMN-15	26.43	27.07	26.14	30.5	30.56	0.06	0.47585	26.5467	21.95	21.91	21.87	21.87	21.95	0.08	0.04	21.91	4.63667
HMT-16	32.04	32.07	32.11	32.04	32.11	0.07	0.0351188	32.0733	30.45	30.38	30.32	30.32	30.45	0.13	0.0650641	30.3833	1.69	3.16333	0.11162
HMN-16	28.66	28.09	28.32	30.75	30.76	0.01	0.286764	28.3567	29.78	29.88	29.83	29.78	29.88	0.1	0.05	29.83	-1.47333
HMT-17	32.89	32.86	32.83	32.83	32.89	0.06	0.03	32.86	24.5	24.29	24.46	24.29	24.5	0.21	0.111505	24.4167	8.44333	6.38333	0.0119791
HMN-17	30.26	30.23	30.29	30.23	30.29	0.06	0.03	30.26	28.01	28.29	28.3	28.01	28.3	0.29	0.164621	28.2	2.06
HMT-18	33.02	33.05	33.09	33.02	33.09	0.07	0.0351188	33.0533	31.57	31.66	31.63	31.57	31.66	0.09	0.0458258	31.62	1.43333	2.80667	0.142925
HMN-18	27.43	27.57	27.44	30.23	30.29	0.06	0.0781025	27.48	28.78	28.88	28.9	28.78	28.9	0.12	0.064291	28.8533	-1.37333
HMT-19	35.13	35.48	35.45	35.13	35.48	0.35	0.193993	35.3533	28	28.03	28.07	28	28.07	0.07	0.0351188	28.0333	7.32	5.00333	0.0311779
HMN-19	28.21	28.27	28.34	32.07	32.19	0.12	0.0650641	28.2733	25.94	26.03	25.9	25.9	26.03	0.13	0.0665833	25.9567	2.31667
